# Supplementary material for: Protective capacity of neutralizing and non-neutralizing antibodies against glycoprotein B of cytomegalovirus
Source: PubMed Central journal article supplement (PMC5595347; doi:10.1371/journal.ppat.1006601), 2017-08-30
Supplement: ppat.1006601.s003.pdf [file ppat.1006601.s003.pdf]

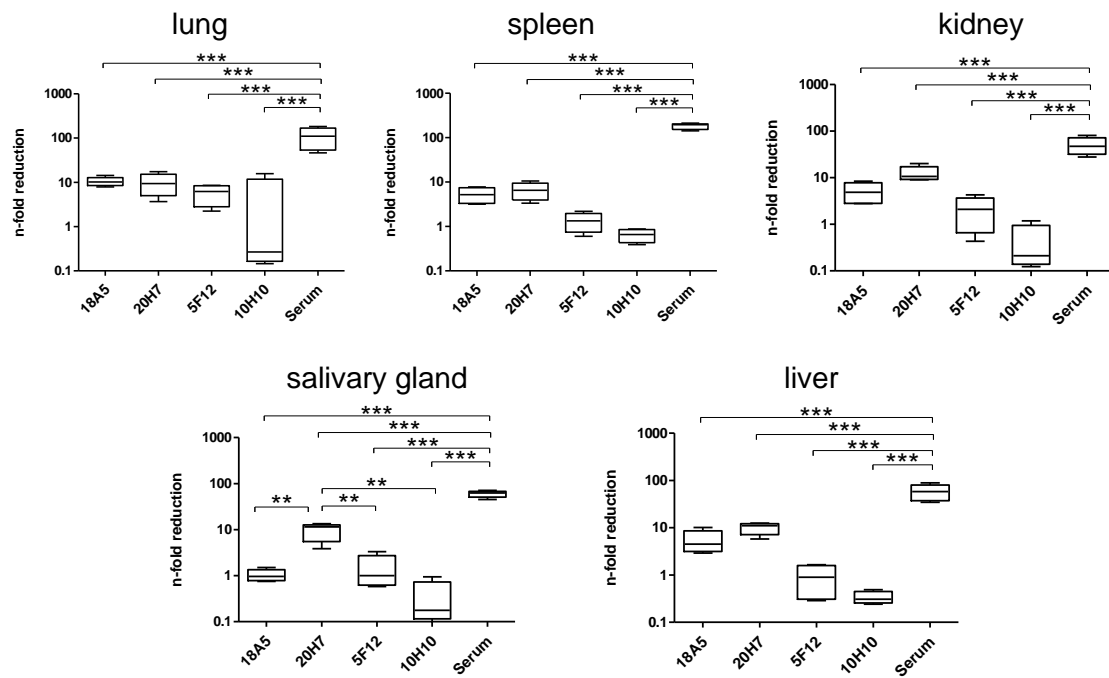

### Supplemental figure S3

Box plots of reduction in viral load compared to isotype control after administration of nonneutralizing mAbs. Viral load in animals treated with the isotype control was set to 100% and used to calculate the reduction in animals treated with mAbs or immune serum. Statistics: One way ANOVA using Bonferroni's multiple comparison test \*:  $p < 0.05$ , \*\*:  $p < 0.01$ , \*\*\*:  $p < 0.001$ , \*\*\*\*:  $p < 0.0001$ .
