# Supplementary material for: Protective capacity of neutralizing and non-neutralizing antibodies against glycoprotein B of cytomegalovirus
Source: PubMed Central journal article supplement (PMC5595347; doi:10.1371/journal.ppat.1006601), 2017-08-30
Supplement: ppat.1006601.s004.pdf [file ppat.1006601.s004.pdf]

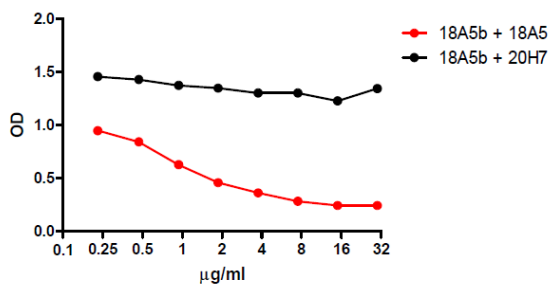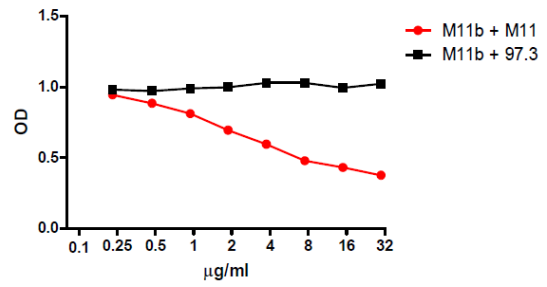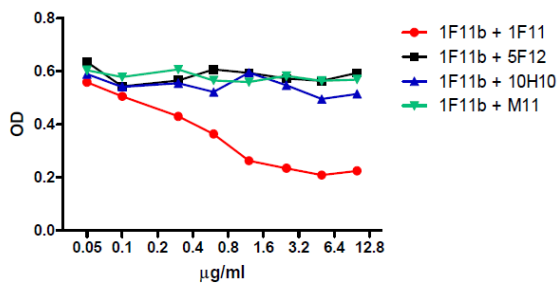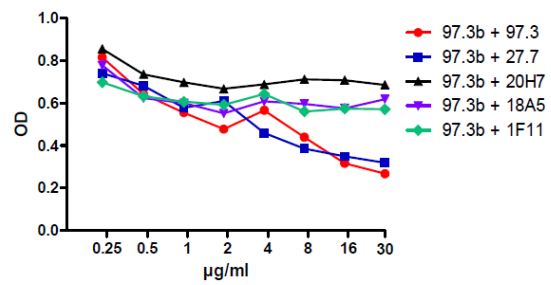

#### Supplemental figure S4

##### Binding competition of gB-specific mAbs.

Individual mAbs were biotinylated using a commercial kit (EZ Link<sup>®</sup> Sulfo-NHS Biotinylation Kit, Thermo Fisher Scientific) according to the suggestions of the manufacturer. Biotinylated mAbs were titrated to determine concentrations within the linear response range to the antigen. A fixed amount of a single biotinylated mAb (b) was then used in competition ELISA using increasing concentrations of competitor mAb as shown on the x-axis.
