# Supplementary material for: Protective capacity of neutralizing and non-neutralizing antibodies against glycoprotein B of cytomegalovirus
Source: PubMed Central journal article supplement (PMC5595347; doi:10.1371/journal.ppat.1006601), 2017-08-30
Supplement: ppat.1006601.s005.pdf [file ppat.1006601.s005.pdf]

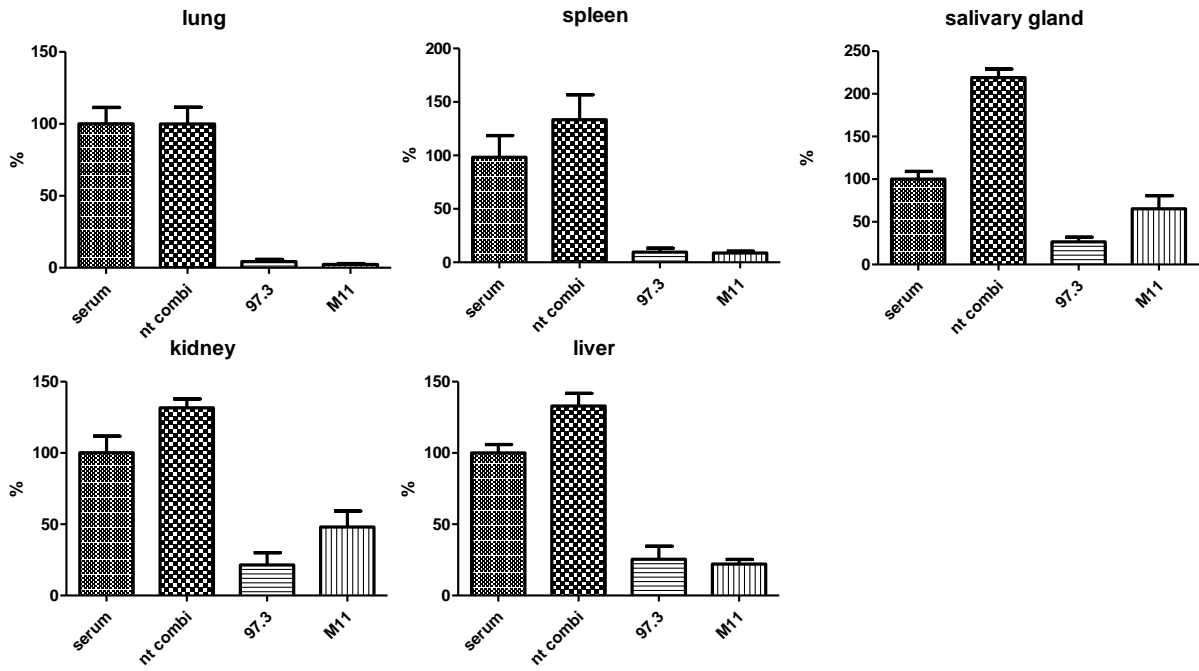

Supplemental figure S5

Relative reduction in viral load by mAbs compared to immune serum.

Reduction in viral load following treatment with serum was set to 100% and the reduction after treatment with the mAb combination 97.3+M11 (nt combi) or individual mAbs (97.3; M11) was calculated. Combined data from 2 experiments. Columns: Mean/SD
