# Supplementary material for: Protective capacity of neutralizing and non-neutralizing antibodies against glycoprotein B of cytomegalovirus
Source: PubMed Central journal article supplement (PMC5595347; doi:10.1371/journal.ppat.1006601), 2017-08-30
Supplement: ppat.1006601.s006.pdf [file ppat.1006601.s006.pdf]

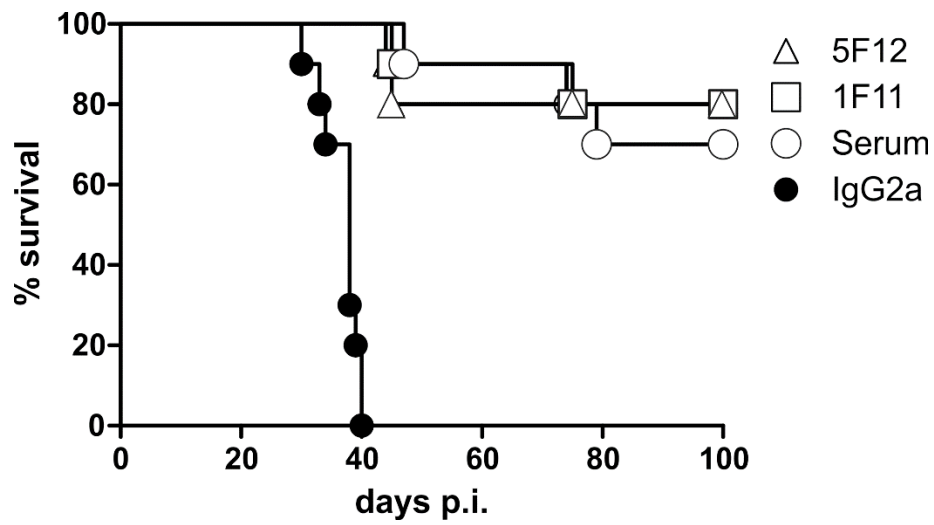

Supplemental figure S6

Survival after prophylactic application of antibodies.

250  $\mu$ g IgG per mouse was applied one day before infection with  $10^4$  pfu of MCMV157luc. Survival was monitored for 100 days p.i. Statistics: log-rank (Mantel-Cox) test:  $p < 0.0001$ . Representative data from 2 independent experiments.
